# Supplementary material
Source: PubMed Central journal article supplement (PMC3516616)
Supplement: NIHMS424212-supplement-01.pdf [file NIHMS424212-supplement-01.pdf]

## Supplementary Material

### Supplementary Table 1.

A priori region of interest (ROI) analysis for new item retrieval orientation effects. Tabulated coordinates are taken from the earlier studies of Woodruff and Hornberger. ROIs had radius = 5 mm and were centered on the closest xyz coordinates in the current study. Results are given of paired *T*-tests on parameter estimates for early and late covariates, extracted and averaged across each ROI (see Procedure: fMRI Analysis for details). ‘Late’ in the region column indicates a region for which the differential activity in the original study loaded on the late (delayed) covariate. The ‘early covariate’ column contains results from the present study using parameter estimates from the canonical HRF. The ‘late covariate’ column contains results from the present study for parameter estimates from the late HRF covariate (for regions loading on the late covariate, plots of fitted responses also confirmed that there was a clear difference in the peak HRF). \*\* Indicates  $T(17)$  significant at  $P < .005$ ; \* indicates  $T(17)$  significant at  $P < .05$ . Region labeling is taken from the original studies. The contrasts in Hornberger et al. (2006) were of activity elicited by visual word test probes when either the corresponding pictures (Pic) or auditorily-presented words (Word) had been studied. The contrasts in Woodruff et al. (2006) were of item-related activity elicited by visual word test probes when either the corresponding pictures (Pic) or visually-presented words (Word) had previously been studied. The retrieval tasks in both studies involved recognition of old and rejection of new (unstudied) items. The reader is referred to the original studies for further details.

| Location of<br>ROI center | Brodmann<br>area | Region | Early<br>covariate | Late<br>covariate |
|---------------------------|------------------|--------|--------------------|-------------------|
|---------------------------|------------------|--------|--------------------|-------------------|

(x, y, z)

**Regions previously showing Picture > Word effects for new items****Hornberger et al. (2006):**

|               |         |                                       |
|---------------|---------|---------------------------------------|
| -27, 24, 18   | --      | Subcortical–intramedullary            |
| -42, -33, -18 | BA20    | Left inferior temporal/fusiform gyrus |
| -24, -36, -21 | BA35/36 | Left parahippocampal gyrus            |
| 6, -90, 0     | BA17    | Right striate cortex                  |

**Woodruff et al. (2006):**

|               |      |                                     |
|---------------|------|-------------------------------------|
| -36, -12, 0   | BA33 | Left insula                         |
| -24, -45, -12 | BA37 | Left fusiform/parahippocampal gyrus |
| 51, 9, -21    | BA21 | Right middle temporal gyrus         |
| 51, -42, -18  | BA20 | Right middle temporal gyrus         |

**Regions previously showing Word > Picture effects for new items****Hornberger et al. (2006):**

|              |         |                            |                        |
|--------------|---------|----------------------------|------------------------|
| 45, 54, 0    | BA10    | Right frontomarginal gyrus | Word>Pic **            |
| -9, 54, 12   | BA9     | Left frontopolar gyrus     |                        |
| -33, 15, 57  | BA6     | Left middle frontal gyrus  |                        |
| -63, -30, 0  | BA21    | Left middle temporal gyrus |                        |
| -48, -33, 27 | BA40/41 | Left parietal operculum    | Word>Pic *             |
| 54, -33, 27  | BA40/41 | Right parietal operculum   | Word>Pic *    Word>Pic |
| 48, -63, 45  | BA7     | Right angular gyrus        |                        |

**Woodruff et al. (2006):**

|              |      |                                        |            |
|--------------|------|----------------------------------------|------------|
| -36, 24, 45  | BA8  | Left middle frontal gyrus              |            |
| -60, -21, -3 | BA21 | Left superior/middle temporal gyrus    | Word>Pic * |
| -27, -57, 39 | BA7  | Left superior parietal cortex          | Word>Pic * |
| -12, -78, 45 | BA7  | Precuneus                              |            |
| -39, 54, 3   | BA10 | Left anterior prefrontal cortex (late) |            |
| -27, -12, 45 | BA6  | Left middle frontal gyrus (late)       |            |
